# Supplementary material for: Sensitive fluorescence biosensor for folate receptor based on terminal protection of small-molecule-linked DNA
Source: Royal Society of Chemistry journal article supplement (doi:10.1039/c2cc31979a), 2012-01-01
Supplement: c2cc31979a.pdf [file c2cc31979a.pdf]

## Supporting Information

### Experimental Sections

#### Reagents and Apparatus

Folic acid (FA) and folate receptor (FR) were purchased from Boisynthesis LTD. (Beijing, China), their stock solutions were prepared in phosphate buffer solution (PBS, pH 7.4) and stored at -20 °C for later use. Exonuclease III (Exo III) was obtained from Sangon Inc. (Shanghai, China). Quinaldine red (QR, the structure was shown in Fig.S1) was purchased from Sigma (St. Louis, MO). Double-distilled water was used throughout the whole process. All other chemicals were of analytical reagent grade and used without further purifying. 1-Ethyl-3-(3-dimethylaminopropyl) carbodiimide hydrochloride (EDC) and N - hydroxy succinimide (NHS) were achieved from Sangon Inc. (Shanghai, China).

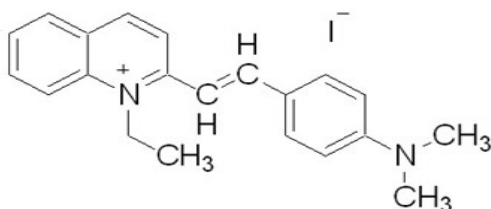

Fig.S1 Chemical structure of Quinaldine red

The DNA sequences used herein were synthesized and purified by Sangon Inc. (Shanghai, China), they were dissolved in Tris-HCl (pH 7.4) buffer solution and stored at 4 °C for later use. The amino-modified guanine-rich single-strand oligomer is a 55-mer oligonucleotide with the -NH<sub>2</sub> label at the 3' end as the following sequences: 5'-AGGG (TTAGGG)<sub>3</sub>-CAGAAGGATAA-(CCCTAA)<sub>3</sub>CCCT-NH<sub>2</sub>-3' (G<sub>55</sub>).

21 Cary Eclipse Fluorescence Spectrophotometer used for the measurements was from  
22 American Varian Corporation. The apparatus parameters were set as follows:  $\lambda_{\text{ex}}= 558$   
23 nm (slit 5 nm),  $\lambda_{\text{em}}= 610-750$  nm (slit 5 nm).

#### 24 **Preparation of the fluorescence biosensor**

25 Firstly, the amino-modified guanine-rich single-strand oligomer (10  $\mu\text{mol/L}$ ) was  
26 hybridized with magnesium ion (100 mmol/L) at 37 °C for 2 h in dark, forming a  
27 stem-loop secondary DNA structure (see Fig.1A ). Subsequently, we incubated the  
28 hairpin DNA with the folic acid solution (50  $\mu\text{mol/L}$ ) in the presence of the  
29 cross-linking agent, which was mixed by 10  $\mu\text{L}$  EDC (1 mmol/L) and 10  $\mu\text{L}$  NHS (5  
30 mmol/L), shaping the DNA-3'-small molecule chimeras. The solution was then  
31 dialyzed against phosphate buffer solution (PBS, pH 7.4) using a dialysis membrane  
32 with molecular weight cutoff of 1000 Da to remove superabundant unreacted folic  
33 acid in process. The dialysis process lasted 3 days in dark place and renovated the  
34 fresh PBS every 4 h.<sup>1</sup> Afterwards, we joined a series of varying concentrations of  
35 folate receptor into the mixture dialyzed entirely for sufficiently incubating at 37 °C  
36 for 1 h in dark. Ultimately, through acceding respectively to 500 U/ml ExoIII, the preceding  
37 mixture solutions were hydrolyzed absolutely about 2 h in the enzymolysis. Before  
38 conducting the fluorescence testing, the solution mingled with potassium ion (100  
39 mmol/L) and quinaldine red (10  $\mu\text{mol/L}$ ). The fluorescent signals of the mixture were  
40 promptly represented with fluorescence spectrophotometer.

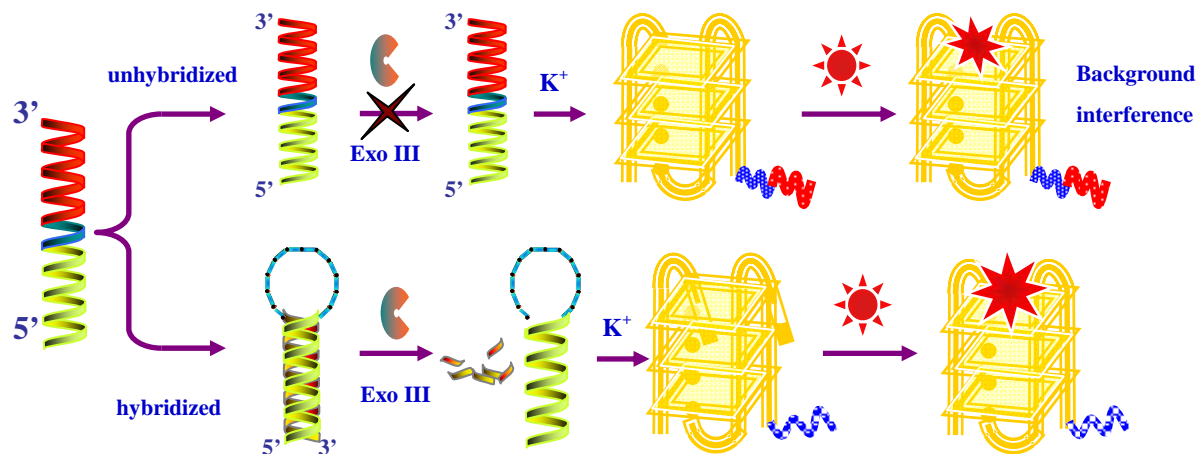

41

42 Fig.S2 Schematic diagram about the interference from the incomplete hybridization

43 **Reference**

- 44 1. Z. Wu, Z. Zhen, J. H. Jiang, G. L. Shen and R. Q. Yu, *J. Am. Chem. Soc.*, 2009,  
45 **131**, 12325–12332.
